# Supplementary material for: Estimated number of ophthalmologists worldwide (International Council of Ophthalmology update): will we meet the needs?
Source: PubMed Central journal article supplement — Br J Ophthalmol. 2019 Jul 2;104(4):588–92. doi: 10.1136/bjophthalmol-2019-314336 (PMC7147181; doi:10.1136/bjophthalmol-2019-314336), 2019-07-02
Supplement: bjophthalmol-2019-314336supp004.pdf [file bjophthalmol-2019-314336supp004.pdf]

**Table 1.** The number of ophthalmologists and ophthalmologist density for 2015, per country.

| Country                | Population, 2015<br>(in thousands) <sup>11</sup> | No. of<br>Ophthalmologists | No. of Ophthalmologists<br>Per Million Population | No. of Ophthalmologists<br>Performing Cataract<br>Surgery Per Million<br>Population | No. of Ophthalmologists<br>Performing Refraction<br>Per Million Population |
|------------------------|--------------------------------------------------|----------------------------|---------------------------------------------------|-------------------------------------------------------------------------------------|----------------------------------------------------------------------------|
| Afghanistan            | 32,527                                           | 138                        | 4.2                                               | Not reported                                                                        | Not reported                                                               |
| Albania                | 2,919                                            | 100                        | 34.3                                              | 4.3                                                                                 | 30.0                                                                       |
| Algeria                | 39,667                                           | 1500                       | 37.8                                              | 23.6                                                                                | 33.1                                                                       |
| Angola                 | 25,022                                           | 22                         | 0.9                                               | 0.1                                                                                 | 0.5                                                                        |
| Antigua and Barbuda    | 92                                               | 2                          | 21.8                                              | 8.2                                                                                 | 19.1                                                                       |
| Argentina              | 43,417                                           | 4500                       | 103.6                                             | 13.0                                                                                | 90.7                                                                       |
| Armenia                | 3,018                                            | 300                        | 99.4                                              | 12.4                                                                                | Not reported                                                               |
| Australia              | 23,969                                           | 961                        | 40.1                                              | 35.1                                                                                | 5.0                                                                        |
| Austria                | 8,545                                            | 945                        | 110.6                                             | 13.8                                                                                | 69.1                                                                       |
| Azerbaijan             | 9,754                                            | 600                        | 61.5                                              | 23.1                                                                                | 7.7                                                                        |
| Bahamas                | 388                                              | 9                          | 23.2                                              | Not reported                                                                        | Not reported                                                               |
| Bahrain                | 1,377                                            | 85                         | 61.7                                              | 23.1                                                                                | 7.7                                                                        |
| Bangladesh             | 160,996                                          | 1000                       | 6.2                                               | Not reported                                                                        | Not reported                                                               |
| Barbados               | 284                                              | 18                         | 63.3                                              | 7.9                                                                                 | 55.4                                                                       |
| Belarus                | 9,496                                            | 600                        | 63.2                                              | 7.9                                                                                 | Not reported                                                               |
| Belgium                | 11,299                                           | 1100                       | 97.4                                              | Not reported                                                                        | Not reported                                                               |
| Belize                 | 359                                              | 5                          | 13.9                                              | Not reported                                                                        | Not reported                                                               |
| Benin                  | 10,880                                           | 40                         | 3.7                                               | 0.5                                                                                 | 3.2                                                                        |
| Bhutan                 | 775                                              | 8                          | 10.3                                              | Not reported                                                                        | Not reported                                                               |
| Bolivia                | 10,725                                           | 300                        | 28.0                                              | 3.5                                                                                 | 24.5                                                                       |
| Bosnia and Herzegovina | 3,810                                            | 212                        | 55.6                                              | 7.0                                                                                 | 48.7                                                                       |
| Botswana               | 2,262                                            | 18                         | 8.0                                               | 1.0                                                                                 | 1.0                                                                        |
| Brazil                 | 207,848                                          | 14000                      | 67.4                                              | 25.3                                                                                | 58.9                                                                       |
| Brunei Darussalam      | 423                                              | 16                         | 37.8                                              | 33.1                                                                                | Not reported                                                               |
| Bulgaria               | 7,150                                            | 862                        | 120.6                                             | 45.2                                                                                | Not reported                                                               |
| Burkina Fasso          | 18,106                                           | 22                         | 1.2                                               | 1.1                                                                                 | 0.5                                                                        |
| Burundi                | 11,179                                           | 14                         | 1.3                                               | 0.2                                                                                 | 1.1                                                                        |
| Cambodia               | 15,578                                           | 61                         | 3.9                                               | 3.4                                                                                 | 2.4                                                                        |
| Cameroon               | 23,344                                           | 85                         | 3.6                                               | 0.5                                                                                 | 3.2                                                                        |
| Canada                 | 35,940                                           | 1221                       | 34.0                                              | 29.7                                                                                | 12.7                                                                       |
| Cape Verde             | 521                                              | 12                         | 23.1                                              | 8.6                                                                                 | 20.2                                                                       |

|                                       |           |       |       |              |              |
|---------------------------------------|-----------|-------|-------|--------------|--------------|
| Central African Republic              | 4,900     | 3     | 0.6   | Not reported | Not reported |
| Chad                                  | 14,037    | 8     | 0.6   | Not reported | Not reported |
| Chile                                 | 17,948    | 893   | 49.8  | 6.2          | 43.5         |
| China                                 | 1,376,049 | 36342 | 26.4  | 9.9          | 9.9          |
| Colombia                              | 48,229    | 1500  | 31.1  | 3.9          | 27.2         |
| Comoros                               | 788       | 1     | 1.3   | Not reported | Not reported |
| Congo, Democratic Republic (Kinshasa) | 77,267    | 87    | 1.1   | 0.4          | 1.0          |
| Congo, Republic of (Brazzaville)      | 4,620     | 8     | 1.7   | Not reported | Not reported |
| Costa Rica                            | 4,808     | 150   | 31.2  | 19.5         | 27.3         |
| Cook Islands                          | 10        | 0     | 0.0   | 0.0          | 0.0          |
| Cote d'Ivoire                         | 22,702    | 106   | 4.7   | 0.6          | Not reported |
| Croatia                               | 4,240     | 417   | 98.3  | 36.9         | Not reported |
| Cuba                                  | 11,390    | 1879  | 165.0 | 103.1        | 61.9         |
| Cyprus                                | 1,165     | 82    | 70.4  | 8.8          | 44.0         |
| Czech Republic                        | 10,543    | 1060  | 100.5 | 88.0         | 37.7         |
| Denmark                               | 5,669     | 450   | 79.4  | 9.9          | 69.5         |
| Djibouti                              | 888       | 4     | 4.5   | 0.6          | 3.9          |
| Dominica                              | 74        | 2     | 27.2  | 10.2         | 23.8         |
| Dominican Republic                    | 10,528    | 432   | 41.0  | 5.1          | 35.9         |
| Ecuador                               | 16,144    | 400   | 24.8  | 3.1          | 21.7         |
| Egypt                                 | 91,508    | 6000  | 65.6  | 24.6         | 41.0         |
| El Salvador                           | 6,127     | 175   | 28.6  | 10.7         | 25.0         |
| Equatorial Guinea                     | 845       | 2     | 2.4   | Not reported | Not reported |
| Eritrea                               | 5,228     | 4     | 0.8   | 0.5          | 0.1          |
| Estonia                               | 1,313     | 130   | 99.0  | 12.4         | 12.4         |
| Ethiopia                              | 99,391    | 142   | 1.4   | 0.9          | 0.5          |
| Fiji                                  | 892       | 28    | 31.4  | 11.8         | 27.5         |
| Finland                               | 5,503     | 450   | 81.8  | 10.2         | 71.5         |
| France                                | 64,395    | 5927  | 92.0  | 34.5         | 80.5         |
| Gabon                                 | 1,725     | 30    | 17.4  | Not reported | Not reported |
| Gambia (The)                          | 1,991     | 2     | 1.0   | 0.9          | 0.6          |
| Georgia                               | 4,000     | 275   | 68.8  | 8.6          | 8.6          |
| Germany                               | 80,689    | 7300  | 90.5  | 11.3         | 79.2         |
| Ghana                                 | 27,410    | 87    | 3.2   | 2.0          | 0.4          |
| Greece                                | 10,955    | 2000  | 182.6 | 22.8         | 159.7        |

|                                  |           |       |       |              |              |
|----------------------------------|-----------|-------|-------|--------------|--------------|
| Grenada                          | 107       | 4     | 37.4  | Not reported | Not reported |
| Guatemala                        | 16,343    | 325   | 19.9  | 2.5          | 17.4         |
| Guinea                           | 12,609    | 32    | 2.5   | Not reported | Not reported |
| Guinea-Bissau                    | 1,844     | 3     | 1.6   | Not reported | Not reported |
| Guyana                           | 767       | 10    | 13.0  | 8.1          | 1.6          |
| Haiti                            | 10,711    | 58    | 5.4   | 0.7          | 4.7          |
| Honduras                         | 8,075     | 95    | 11.8  | 4.4          | 10.3         |
| Hong Kong SAR                    | 7,288     | 271   | 37.2  | 32.5         | 4.6          |
| Hungary                          | 9,855     | 960   | 97.4  | 36.5         | 12.2         |
| Iceland                          | 329       | 31    | 94.1  | 35.3         | 82.3         |
| India                            | 1,311,051 | 17000 | 13.0  | 8.1          | 11.3         |
| Indonesia                        | 257,564   | 1300  | 5.0   | 3.2          | 4.4          |
| Iran (Islamic Republic of)       | 79,109    | 1700  | 21.5  | 13.4         | 13.4         |
| Iraq                             | 36,423    | 600   | 16.5  | 14.4         | 14.4         |
| Ireland                          | 4,688     | 180   | 38.4  | 14.4         | 14.4         |
| Israel                           | 8,064     | 650   | 80.6  | 30.2         | 10.1         |
| Italy                            | 59,798    | 7000  | 117.1 | 43.9         | 102.4        |
| Jamaica                          | 2,793     | 50    | 17.9  | 15.7         | 11.2         |
| Japan                            | 126,573   | 14439 | 114.1 | 14.3         | 14.3         |
| Jordan                           | 7,595     | 340   | 44.8  | 16.8         | 16.8         |
| Kazakhstan                       | 17,625    | 583   | 33.1  | Not reported | Not reported |
| Kenya                            | 46,050    | 45    | 1.0   | 0.9          | 0.9          |
| Kiribati                         | 112       | 1     | 8.9   | 7.8          | 7.8          |
| Korea North (DPRK)               | 25,155    | 1230  | 48.9  | Not reported | Not reported |
| Korea South (Republic of Korea)  | 50,293    | 3425  | 68.1  | 42.6         | 59.6         |
| Kuwait                           | 3,892     | 172   | 44.2  | Not reported | Not reported |
| Kyrgyzstan                       | 5,940     | 260   | 43.8  | Not reported | Not reported |
| Lao People's Democratic Republic | 6,802     | 27    | 4.0   | 3.5          | 0.5          |
| Latvia                           | 1,971     | 252   | 127.9 | 48.0         | Not reported |
| Lebanon                          | 5,851     | 250   | 42.7  | Not reported | Not reported |
| Lesotho                          | 2,135     | 5     | 2.3   | Not reported | Not reported |
| Liberia                          | 4,503     | 5     | 1.1   | 0.1          | 0.4          |
| Libyan Arab Jamahiriya           | 6,278     | 260   | 41.4  | Not reported | Not reported |
| Lithuania                        | 2,878     | 350   | 121.6 | Not reported | Not reported |
| Luxembourg                       | 567       | 50    | 88.2  | Not reported | Not reported |

|                                             |         |      |      |              |              |
|---------------------------------------------|---------|------|------|--------------|--------------|
| Macedonia (The Former Yugoslav Republic of) | 2,078   | 160  | 77.0 | Not reported | Not reported |
| Madagascar                                  | 24,235  | 24   | 1.0  | Not reported | Not reported |
| Malawi                                      | 17,215  | 9    | 0.5  | 0.5          | 0.2          |
| Malaysia                                    | 30,331  | 401  | 13.2 | 11.6         | 1.7          |
| Maldives                                    | 364     | 19   | 52.2 | 32.7         | 45.7         |
| Mali                                        | 17,600  | 35   | 2.0  | 1.2          | 1.2          |
| Malta                                       | 419     | 21   | 50.2 | Not reported | Not reported |
| Marshall Islands                            | 72      | 1    | 13.9 | Not reported | Not reported |
| Mauritania                                  | 4,068   | 6    | 1.5  | Not reported | Not reported |
| Mauritius                                   | 1,273   | 32   | 25.1 | Not reported | Not reported |
| Mexico                                      | 127,017 | 5400 | 42.5 | 26.6         | 37.2         |
| Micronesia (Federated state of)             | 104     | 0    | 0.0  | 0.0          | 0.0          |
| Moldova (Republic of)                       | 4,069   | 290  | 71.3 | 8.9          | 62.4         |
| Mongolia                                    | 2,959   | 130  | 43.9 | 5.5          | 5.5          |
| Montenegro                                  | 626     | 45   | 71.9 | 9.0          | 62.9         |
| Morocco                                     | 34,950  | 1200 | 34.3 | Not reported | Not reported |
| Mozambique                                  | 27,978  | 28   | 1.0  | 0.9          | 0.9          |
| Myanmar (Burma)                             | 53,897  | 312  | 5.8  | 5.1          | 5.1          |
| Namibia                                     | 2,459   | 10   | 4.1  | 3.6          | 0.5          |
| Nauru                                       | 10      | 0    | 0.0  | 0.0          | 0.0          |
| Nepal                                       | 28,514  | 240  | 8.4  | 5.3          | 5.3          |
| Netherlands                                 | 16,925  | 637  | 37.6 | 32.9         | ?            |
| New Zealand                                 | 4,529   | 126  | 27.8 | 24.3         | 3.5          |
| Nicaragua                                   | 6,082   | 120  | 19.7 | 2.5          | 2.5          |
| Niger                                       | 19,899  | 20   | 1.0  | 0.9          | 0.9          |
| Nigeria                                     | 182,202 | 540  | 3.0  | 1.9          | 2.6          |
| Niue                                        | 1       | 0    | 0.0  | 0.0          | 0.0          |
| Norway                                      | 5,211   | 422  | 81.0 | 50.6         | 70.9         |
| Oman                                        | 4,491   | 222  | 49.4 | 30.9         | 6.2          |
| Pakistan                                    | 188,925 | 2800 | 14.8 | 13.0         | 13.0         |
| Palau                                       | 21      | 1    | 47.0 | 29.4         | 41.1         |
| Panama                                      | 3,929   | 117  | 29.8 | 18.6         | 11.2         |
| Papua New Guinea                            | 7,619   | 11   | 1.4  | 0.5          | 1.3          |
| Paraguay                                    | 6,639   | 230  | 34.6 | 4.3          | 30.3         |
| Peru                                        | 31,377  | 1241 | 39.6 | 14.8         | 34.6         |

|                                |         |       |       |              |              |
|--------------------------------|---------|-------|-------|--------------|--------------|
| Philippines                    | 100,699 | 1534  | 15.2  | 13.3         | 13.3         |
| Poland                         | 38,612  | 4565  | 118.2 | Not reported | Not reported |
| Portugal                       | 10,350  | 600   | 58.0  | 36.2         | 50.7         |
| Puerto Rico                    | 3,683   | 210   | 57.0  | 35.6         | 49.9         |
| Qatar                          | 2,235   | 124   | 55.5  | Not reported | Not reported |
| Romania                        | 19,511  | 1200  | 61.5  | 23.1         | 53.8         |
| Russia                         | 143,457 | 13700 | 95.5  | 59.7         | 35.8         |
| Rwanda                         | 11,610  | 17    | 1.5   | 0.5          | 1.3          |
| Saint Kitts & Nevis            | 52      | 2     | 38.6  | 24.1         | 24.1         |
| Saint Lucia                    | 185     | 8     | 43.2  | Not reported | Not reported |
| Saint Vincent & the Grenadines | 109     | 8     | 73.1  | 9.1          | 63.9         |
| Samoa                          | 193     | 1     | 5.2   | 0.6          | 0.6          |
| Sao Tome and Principe          | 190     | 1     | 5.3   | Not reported | Not reported |
| Saudi Arabia                   | 31,540  | 2546  | 80.7  | 50.5         | 10.1         |
| Senegal                        | 15,129  | 60    | 4.0   | Not reported | Not reported |
| Serbia                         | 8,851   | 750   | 84.7  | 10.6         | 74.1         |
| Seychelles                     | 96      | 4     | 41.5  | 36.3         | 5.2          |
| Sierra Leone                   | 6,453   | 6     | 0.9   | Not reported | Not reported |
| Singapore                      | 5,604   | 239   | 42.7  | 37.3         | 5.3          |
| Slovakia                       | 5,426   | 650   | 119.8 | Not reported | Not reported |
| Slovenia                       | 2,068   | 130   | 62.9  | 7.9          | 7.9          |
| Solomon Islands                | 584     | 5     | 8.6   | 7.5          | 5.4          |
| Somalia                        | 10,787  | 4     | 0.4   | 0.2          | 0.3          |
| South Africa                   | 54,490  | 280   | 5.1   | 1.9          | 0.6          |
| South Sudan                    | 12,340  | 5     | 0.4   | 0.3          | 0.2          |
| Spain                          | 46,122  | 4865  | 105.5 | 65.9         | 65.9         |
| Sri Lanka                      | 20,715  | 104   | 5.0   | 4.4          | 4.4          |
| Sudan                          | 40,235  | 506   | 12.6  | Not reported | Not reported |
| Suriname                       | 543     | 12    | 22.1  | 19.3         | 19.3         |
| Swaziland                      | 1,287   | 2     | 1.6   | Not reported | Not reported |
| Sweden                         | 9,779   | 900   | 92.0  | 11.5         | 80.5         |
| Switzerland                    | 8,299   | 830   | 100.0 | 12.5         | 87.5         |
| Syrian Arab Republic           | 18,502  | 1051  | 56.8  | 7.1          | 7.1          |
| Taiwan                         | 23,381  | 1500  | 64.2  | 40.1         | 56.1         |
| Tajikistan                     | 8,482   | 77    | 9.1   | Not reported | Not reported |
| Tanzania                       | 53,470  | 44    | 0.8   | 0.1          | 0.1          |

|                                       |                  |                |              |              |              |
|---------------------------------------|------------------|----------------|--------------|--------------|--------------|
| Thailand                              | 67,959           | 1300           | 19.1         | 7.2          | 2.4          |
| Timor-Leste                           | 1,185            | 5              | 4.2          | Not reported | Not reported |
| Togo                                  | 7,305            | 28             | 3.8          | 1.4          | 3.4          |
| Tonga                                 | 106              | 1              | 9.4          | Not reported | Not reported |
| Trinidad and Tobago                   | 1,360            | 35             | 25.7         | 9.7          | 3.2          |
| Tunisia                               | 11,254           | 500            | 44.4         | 5.6          | 27.8         |
| Turkey                                | 78,666           | 3500           | 44.5         | 16.7         | 38.9         |
| Turkmenistan                          | 5,374            | 120            | 22.3         | Not reported | Not reported |
| Tuvalu                                | 11               | 0              | 0.0          | 0.0          | 0.0          |
| Uganda                                | 39,032           | 45             | 1.2          | 1.0          | 1.0          |
| Ukraine                               | 44,824           | 2973           | 66.3         | 8.3          | 24.9         |
| United Arab Emirates                  | 9,157            | 125            | 13.7         | Not reported | Not reported |
| United Kingdom                        | 64,716           | 3000           | 46.4         | 40.6         | 5.8          |
| United States                         | 321,774          | 17600          | 54.7         | 34.2         | 34.2         |
| Uruguay                               | 3,432            | 220            | 64.1         | 8.0          | 56.1         |
| Uzbekistan                            | 29,893           | 2054           | 68.7         | Not reported | Not reported |
| Vanuatu                               | 265              | 1              | 3.8          | 3.3          | 2.4          |
| Venezuela (Bolivarian<br>Republic of) | 31,108           | 1200           | 38.6         | 4.8          | 33.8         |
| Viet Nam                              | 93,448           | 1300           | 13.9         | 1.7          | 8.7          |
| Yemen                                 | 26,832           | 317            | 11.8         | 7.4          | 1.5          |
| Zambia                                | 16,212           | 30             | 1.9          | 0.2          | 0.2          |
| Zimbabwe                              | 15,603           | 27             | 1.7          | Not reported | Not reported |
| <b>Total</b>                          | <b>7,339,951</b> | <b>232,866</b> | <b>31.7*</b> | <b>14.1*</b> | <b>19*</b>   |

\*Global mean based on number of countries reporting data.
