# Supplementary figures and images for: Estimated number of ophthalmologists worldwide (International Council of Ophthalmology update): will we meet the needs?
Source: PubMed Central journal article supplement — Br J Ophthalmol. 2019 Jul 2;104(4):588–92. doi: 10.1136/bjophthalmol-2019-314336 (PMC7147181; doi:10.1136/bjophthalmol-2019-314336), 2019-07-02

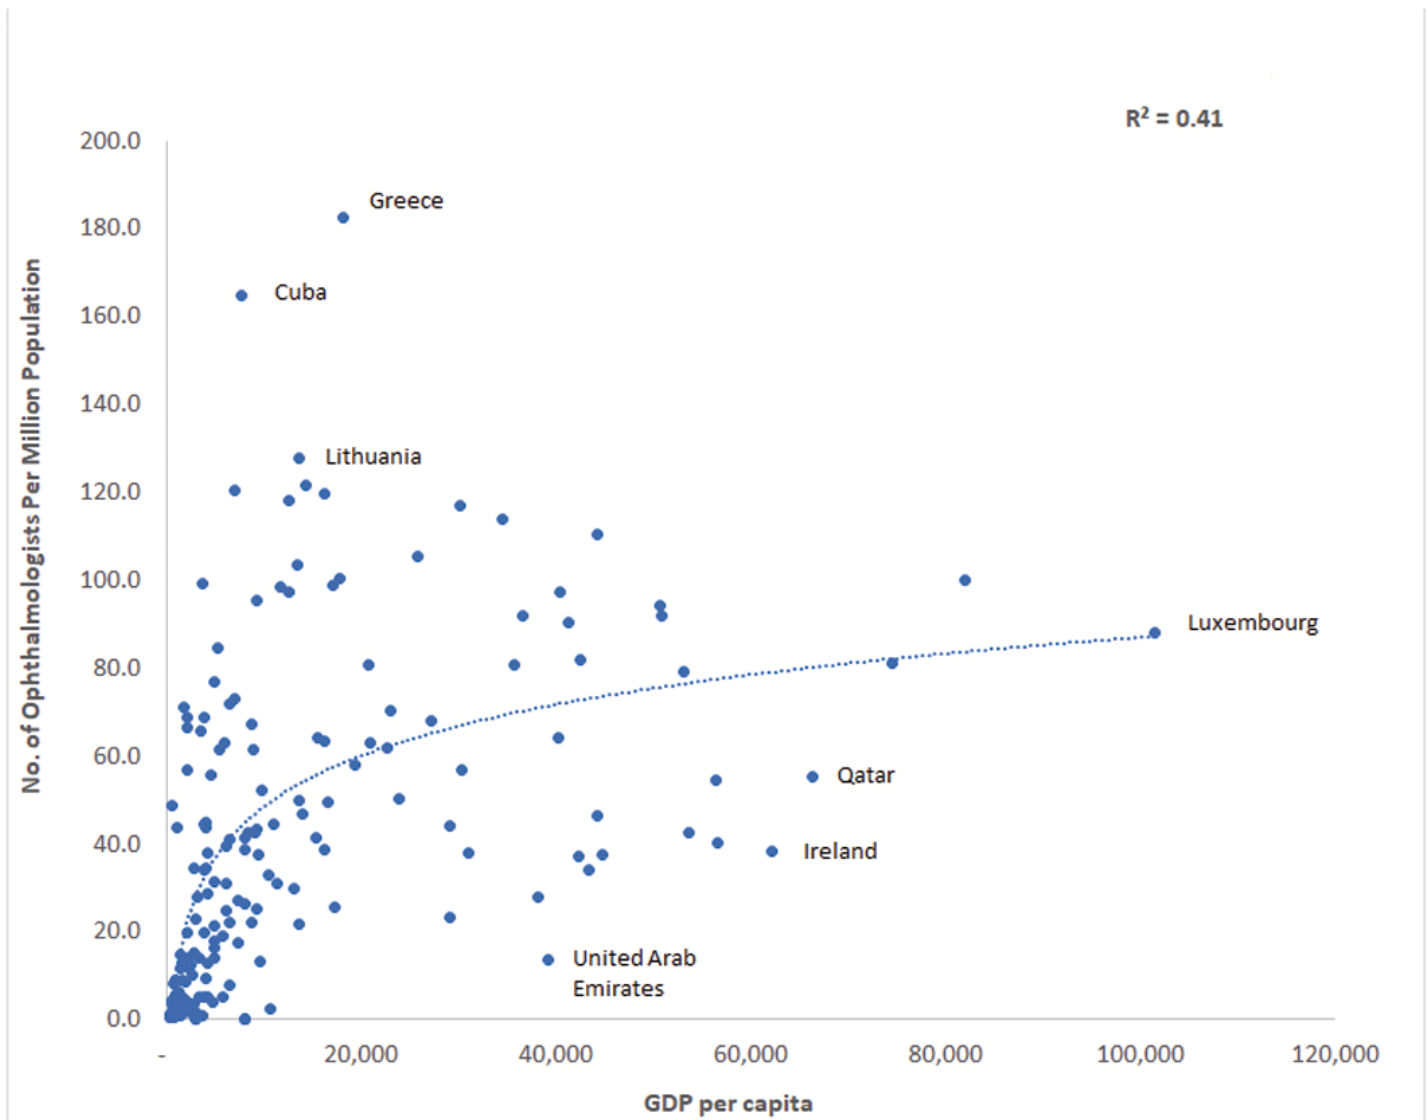

Supplement: bjophthalmol-2019-314336supp001.pdf [file bjophthalmol-2019-314336supp001.pdf]

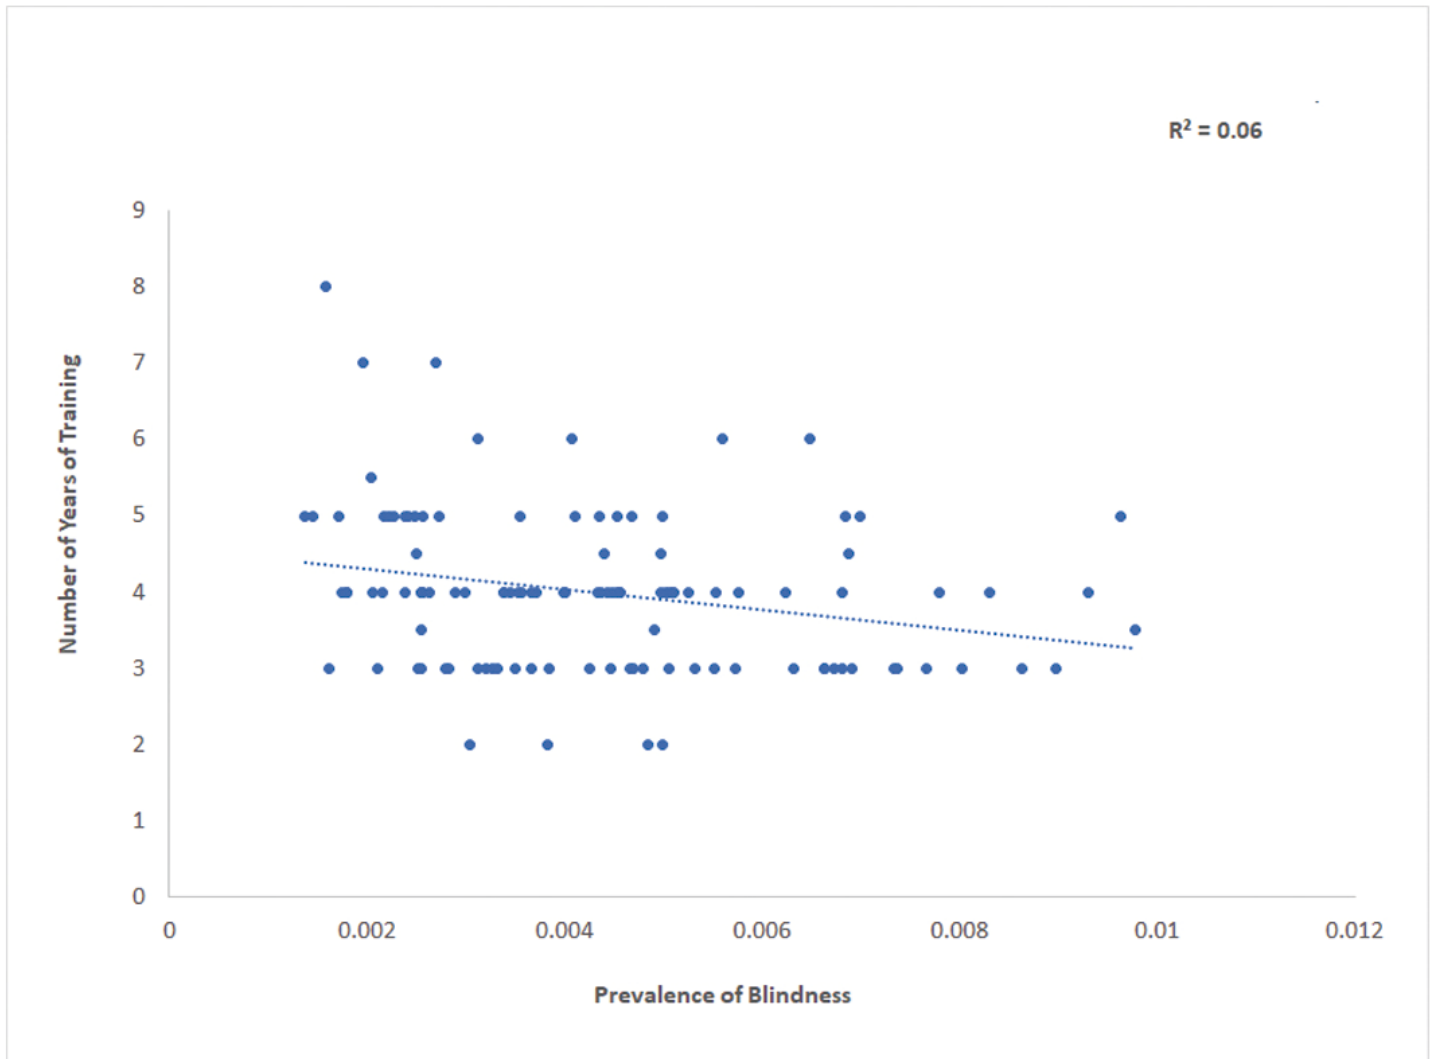

Supplement: bjophthalmol-2019-314336supp002.pdf [file bjophthalmol-2019-314336supp002.pdf]

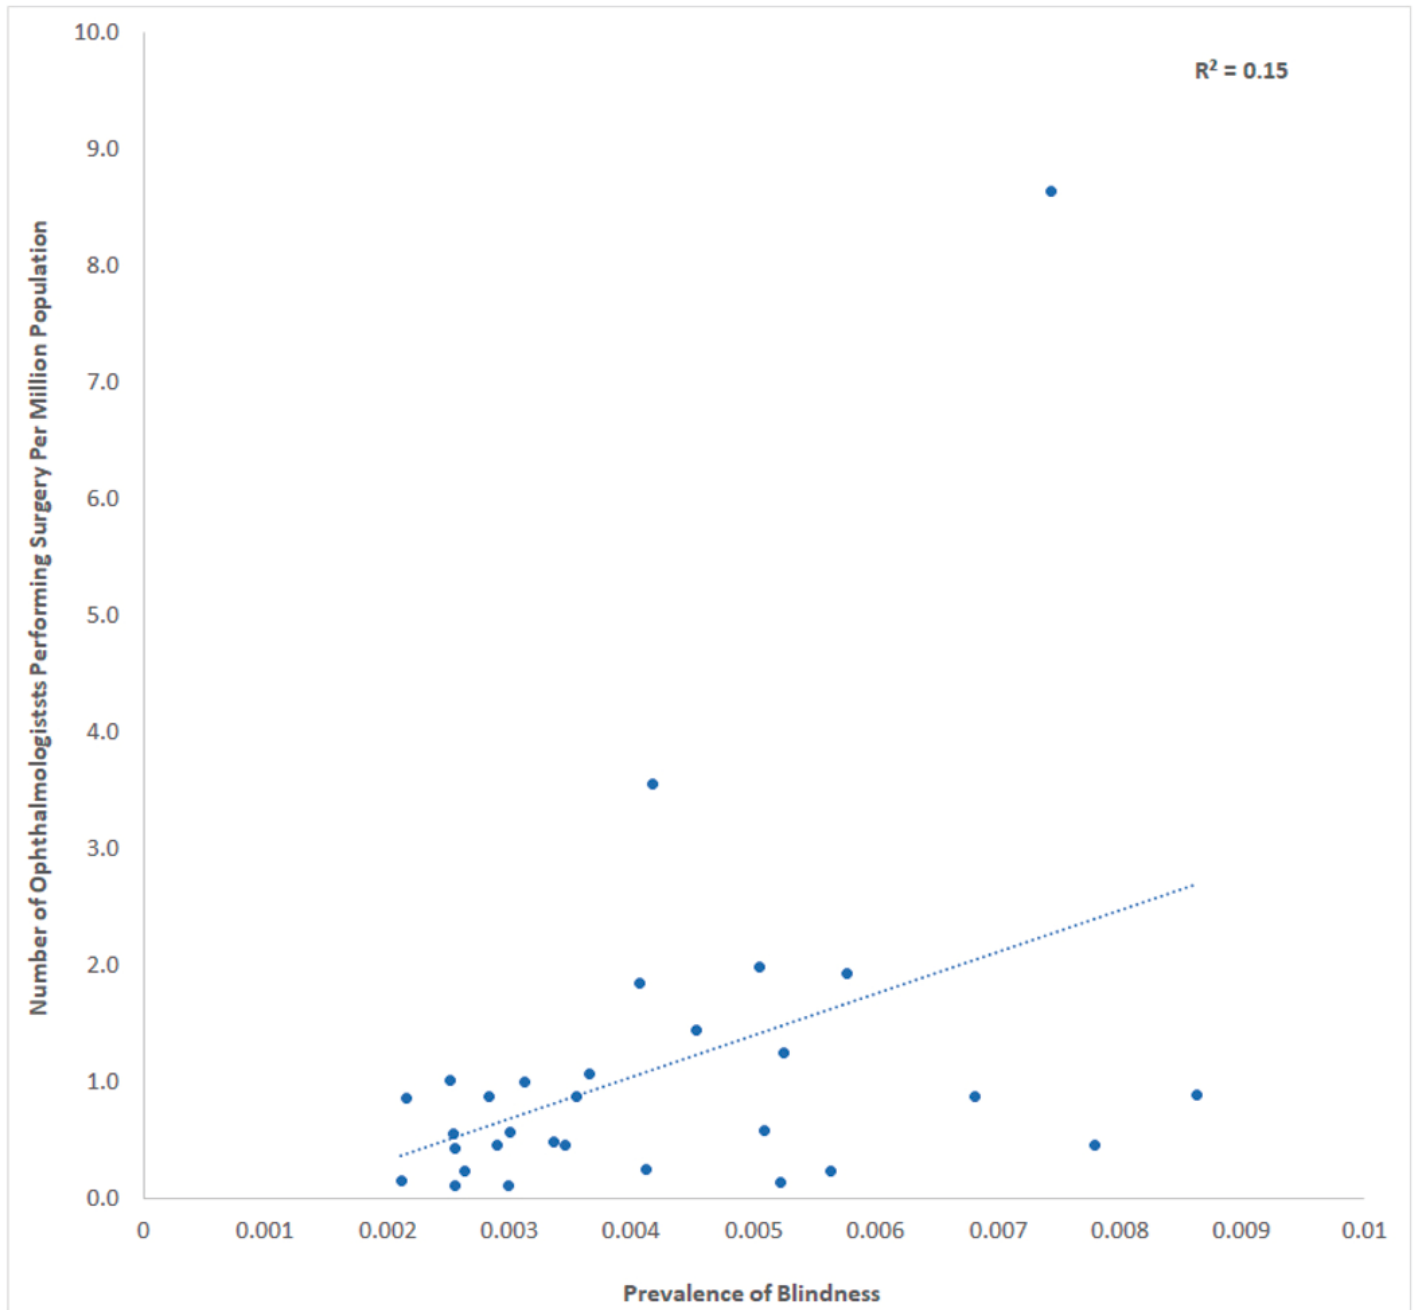

Supplement: bjophthalmol-2019-314336supp003.pdf [file bjophthalmol-2019-314336supp003.pdf]
